# Supplementary material for: Extracellular vesicles secreted by Brugia malayi microfilariae modulate the melanization pathway in the mosquito host
Source: PubMed Central journal article supplement (PMC10232515; doi:10.1038/s41598-023-35940-9), 2023-05-31
Supplement: 41598_2023_35940_MOESM3_ESM.pdf [file 41598_2023_35940_MOESM3_ESM.pdf]

## **Supplemental Materials for**

### **Extracellular vesicles secreted by *Brugia malayi* microfilariae modulate the melanization pathway in the mosquito host**

**Hannah J. Loghry<sup>1\*</sup>, Hyeogsun Kwon<sup>2</sup>, Ryan C. Smith<sup>2</sup>, Noelle A. Sondjaja<sup>1</sup>, Sarah J. Minkler<sup>1</sup>, Sophie Young<sup>1</sup>, Nicolas J. Wheeler<sup>3</sup>, Mostafa Zamanian<sup>4</sup>, Lyric C. Bartholomay<sup>4</sup>,  
Michael J. Kimber<sup>1</sup>**

<sup>1</sup>Department of Biomedical Sciences, College of Veterinary Medicine, Iowa State University,  
Ames, Iowa, USA

<sup>2</sup>Department of Entomology, College of Agriculture and Life Sciences, Iowa State University,  
Ames, Iowa, USA

<sup>3</sup>Department of Biology, College of Arts and Sciences, University of Wisconsin-Eau Claire,  
Eau Claire, Wisconsin, USA

<sup>4</sup>Department of Pathobiological Sciences, School of Veterinary Medicine, University of  
Wisconsin-Madison, Madison, Wisconsin, USA

### **Supplemental Materials 1: miRNA-Seq Data Excel File**

Contain full list of miRNAs identified in each treatment group, raw read counts for miRNAs mapped to both *Ae. aegypti* and *B. malayi*, and calculated fold changes and associated p-values.

### **Supplemental Materials 2: mRNA-Seq Data Excel File**

Contain full list of differentially expressed mRNAs of LPS v LPS + *B. malayi* EV, raw read counts for identified mRNAs, and calculated fold changes and associated p-values.

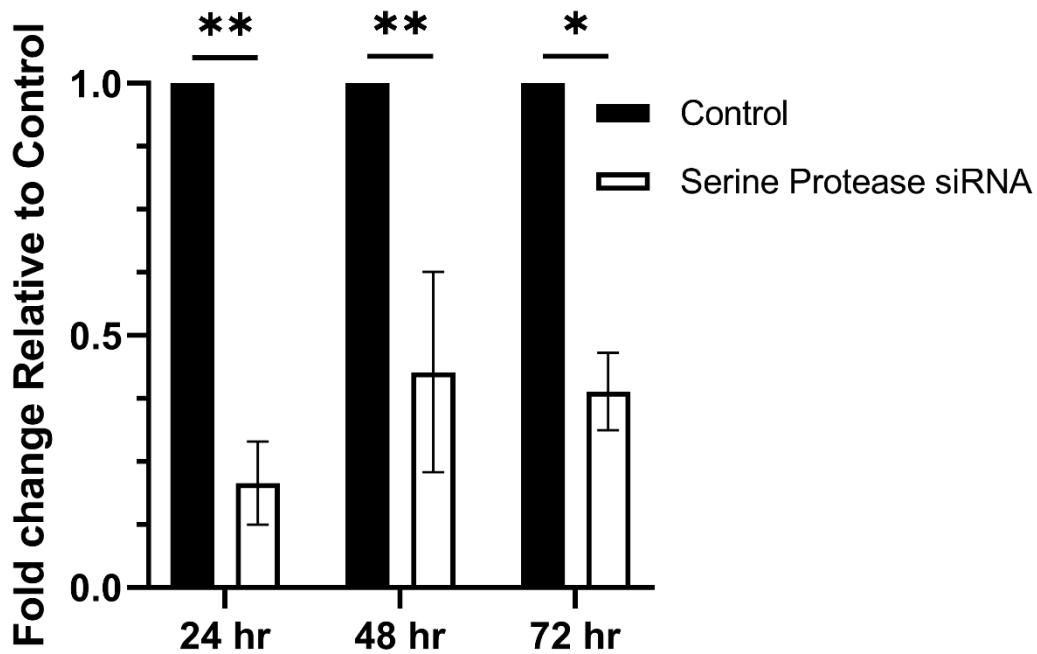

### Supplemental Materials 3: Efficiency time course of RNAi knockdown of AAEL002590

Aag2 cells were treated with 1 pmol (final concentration) of duplexed siRNA. Gene expression of AAEL002590 was quantified using RT-qPCR. Expression of AAEL002590 was significantly reduced 79%, 57%, and 61% at 24 h, 48 h and 72 h post-treatment, respectively, as compared to control cells. Knockdown was the most efficient 24 h post-treatment therefore this time point was used in all experiments going forward. N = 3 (minimum). Mean  $\pm$  SEM. \*P < 0.05, \*\*P < 0.01.

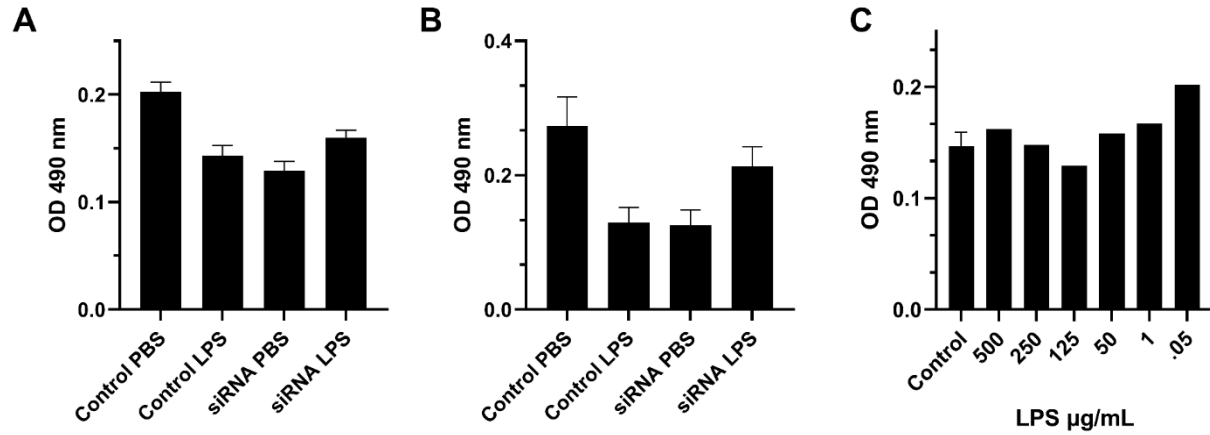

#### Supplemental Materials 4: LPS did not strongly induce PO activity in Aag2 cells

Aag2 cells were treated with either 1X dPBS or LPS (500 ng/mL) to test the effects of knockdown of the serine protease gene on PO activity *in vitro*. Both six h post-treatment (A) and 24 h post-treatment (B) LPS failed to induce PO activity as expected. A dose response experiment of various LPS concentrations (C) showed that no concentration of LPS was strongly inducing PO activity.

| <b>Experiment</b>                  | <b>Gene</b>                   | <b>Forward Primer</b>    | <b>Reverse Primer</b>      |
|------------------------------------|-------------------------------|--------------------------|----------------------------|
| RT-qPCR gene expression validation |                               |                          |                            |
|                                    | AAEL002590                    | AGAGCCTAGTTGCGTTGTTAG    | CTGTACTGACTTCTGTGGGAAC     |
|                                    | Housekeeping Gene (RPS17)     | CACTCCCAGGTCCGTGGTAT     | GCACACTTCCGGCACGTAGT       |
| RNAi                               |                               |                          |                            |
|                                    | Duplexed siRNA for AAEL002590 | AAAGAUAUCAUUGCUAGUGACCAA | UCUUUCUAUAGUAACGAUCACUGGUU |

### **Supplemental Materials 5: Primer Sequences**

Primer sequences for RT-qPCR validation of AAEL002590 (serine protease). RT-qPCR data were normalized against the housekeeping gene RPS17. Duplexed siRNA for knockdown of AAEL002590 was produced by Integrated DNA Technologies with the provided.
